# Supplementary material
Source: publisher figshare collection journal article supplement (https://plos.figshare.com/articles/dataset/_/120509)
Supplement: Supplementary file 1 [file 1]

Archive with 5 entries (5 files):
- Figure_S1.tif
- Figure_S2.tif
- Figure_S3.tif
- Text_S1.pdf
- Text_S2.docx
